# Supplementary material for: Evaluation of the Association between Low-Density Lipoprotein (LDL) and All-Cause Mortality in Geriatric Patients with Hip Fractures: A Prospective Cohort Study of 339 Patients
Source: MDPI journal article supplement (doi:10.3390/jpm13020345), 2023-02-16
Supplement: s1 [file s1]

**Table S1. Effects of factors on mortality measured by univariate analysis**

|                            | Statistics   | HR (95% CI)        | <i>P</i> -value |
|----------------------------|--------------|--------------------|-----------------|
| Age (year)                 | 80.03±6.46   | 1.07 (1.04, 1.11)  | <0.0001         |
| Sex                        |              |                    |                 |
| Male                       | 112 (33.04%) | 1                  |                 |
| Female                     | 227 (66.96%) | 0.74 (0.49, 1.11)  | 0.1463          |
| Occupation                 |              |                    |                 |
| Retirement                 | 191 (56.34%) | 1                  |                 |
| Farmer                     | 75 (22.12%)  | 1.06 (0.65, 1.72)  | 0.8128          |
| Other                      | 73 (21.53%)  | 0.89 (0.54, 1.49)  | 0.6671          |
| History of allergy         | 27 (7.96%)   | 0.47 (0.17, 1.27)  | 0.1339          |
| Injury mechanism           |              |                    |                 |
| Falling                    | 330 (97.35%) | 1                  |                 |
| Accident                   | 5 (1.47%)    | 0.60 (0.08, 4.32)  | 0.6134          |
| Other                      | 4 (1.18%)    | 3.81 (1.20, 12.06) | 0.023           |
| Fracture classification    |              |                    |                 |
| Intertrochanteric fracture | 239 (70.50%) | 1                  |                 |
| Femoral neck fracture      | 92 (27.14%)  | 0.74 (0.46, 1.19)  | 0.2121          |
| Subtrochanteric fracture   | 8 (2.36%)    | 0.68 (0.17, 2.76)  | 0.5865          |
| Hypertension               | 196 (57.82%) | 0.76 (0.51, 1.13)  | 0.1792          |
| Diabetes                   | 70 (20.65%)  | 1.18 (0.75, 1.87)  | 0.4791          |
| CHD                        | 166 (48.97%) | 1.62 (1.08, 2.42)  | 0.0187          |
| Arrhythmia                 | 98 (28.91%)  | 1.95 (1.30, 2.90)  | 0.0011          |

|                        |                |                   |         |
|------------------------|----------------|-------------------|---------|
| Hemorrhagic stroke     | 9 (2.65%)      | 0.29 (0.04, 2.07) | 0.216   |
| Ischemic stroke        | 120 (35.40%)   | 1.10 (0.73, 1.66) | 0.6339  |
| Cancer                 | 9 (2.65%)      | 1.23 (0.39, 3.87) | 0.7292  |
| Multiple injuries      | 20 (5.90%)     | 0.69 (0.25, 1.88) | 0.4674  |
| Dementia               | 19 (5.60%)     | 2.60 (1.39, 4.87) | 0.0028  |
| COPD                   | 18 (5.31%)     | 1.00 (0.41, 2.46) | 0.9995  |
| Hepatitis              | 6 (1.77%)      | 0.53 (0.07, 3.79) | 0.5258  |
| Gastritis              | 7 (2.06%)      | 0.84 (0.21, 3.41) | 0.8062  |
| Time to admission (h)  | 107.70±359.09  | 1.00 (1.00, 1.00) | 0.7905  |
| Time to operation (d)  | 4.68±2.31      | 0.97 (0.88, 1.07) | 0.5011  |
| Treatment strategy     |                |                   |         |
| Conservation           | 23 (6.78%)     | 1                 |         |
| ORIF                   | 222 (65.49%)   | 0.25 (0.15, 0.44) | <0.0001 |
| HA                     | 92 (27.14%)    | 0.25 (0.13, 0.48) | <0.0001 |
| THA                    | 2 (0.59%)      | 0.00 (0.00, Inf)  | 0.9942  |
| Operation time (mins)  | 99.14±37.30    | 1.00 (1.00, 1.01) | 0.7478  |
| Blood loss (mL)        | 233.46±144.64  | 1.00 (1.00, 1.00) | 0.2451  |
| Infusion (mL)          | 1570.70±367.40 | 1.00 (1.00, 1.00) | 0.3681  |
| Transfusion (U)        | 1.07±1.26      | 1.04 (0.88, 1.23) | 0.6528  |
| Length in hospital (d) | 8.46±2.93      | 1.02 (0.96, 1.09) | 0.485   |

---
